# Supplementary material
Source: PubMed Central journal article supplement (PMC7293613)
Supplement: pnas.1921964117.sapp.pdf [file pnas.1921964117.sapp.pdf]

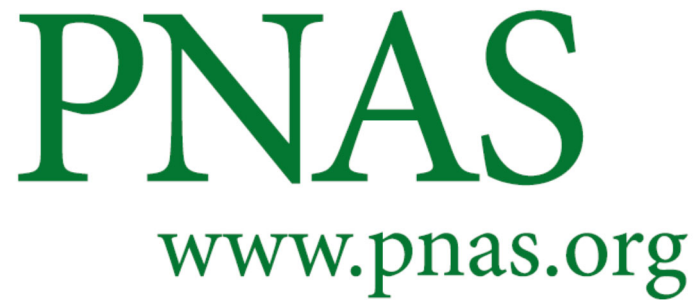

Supplementary Information for:

**High affinity oligoclonal TCRs define effective adoptive T-cell therapy targeting mutant KRAS-G12D**

Malcolm J. W. Sim<sup>a,b</sup>, Jinghua Lu<sup>a</sup>, Matthew Spencer<sup>a</sup>, Francis Hopkins<sup>a</sup>, Eric Tran<sup>c</sup>, Steven A. Rosenberg<sup>c</sup>, Eric O. Long<sup>b</sup> and Peter D. Sun<sup>a\*</sup>

\*Correspondence: [psun@niaid.nih.gov](mailto:psun@niaid.nih.gov)

**This PDF file includes:**

Figures S1 to S5  
Tables S1 to S4

**Figure S1.**

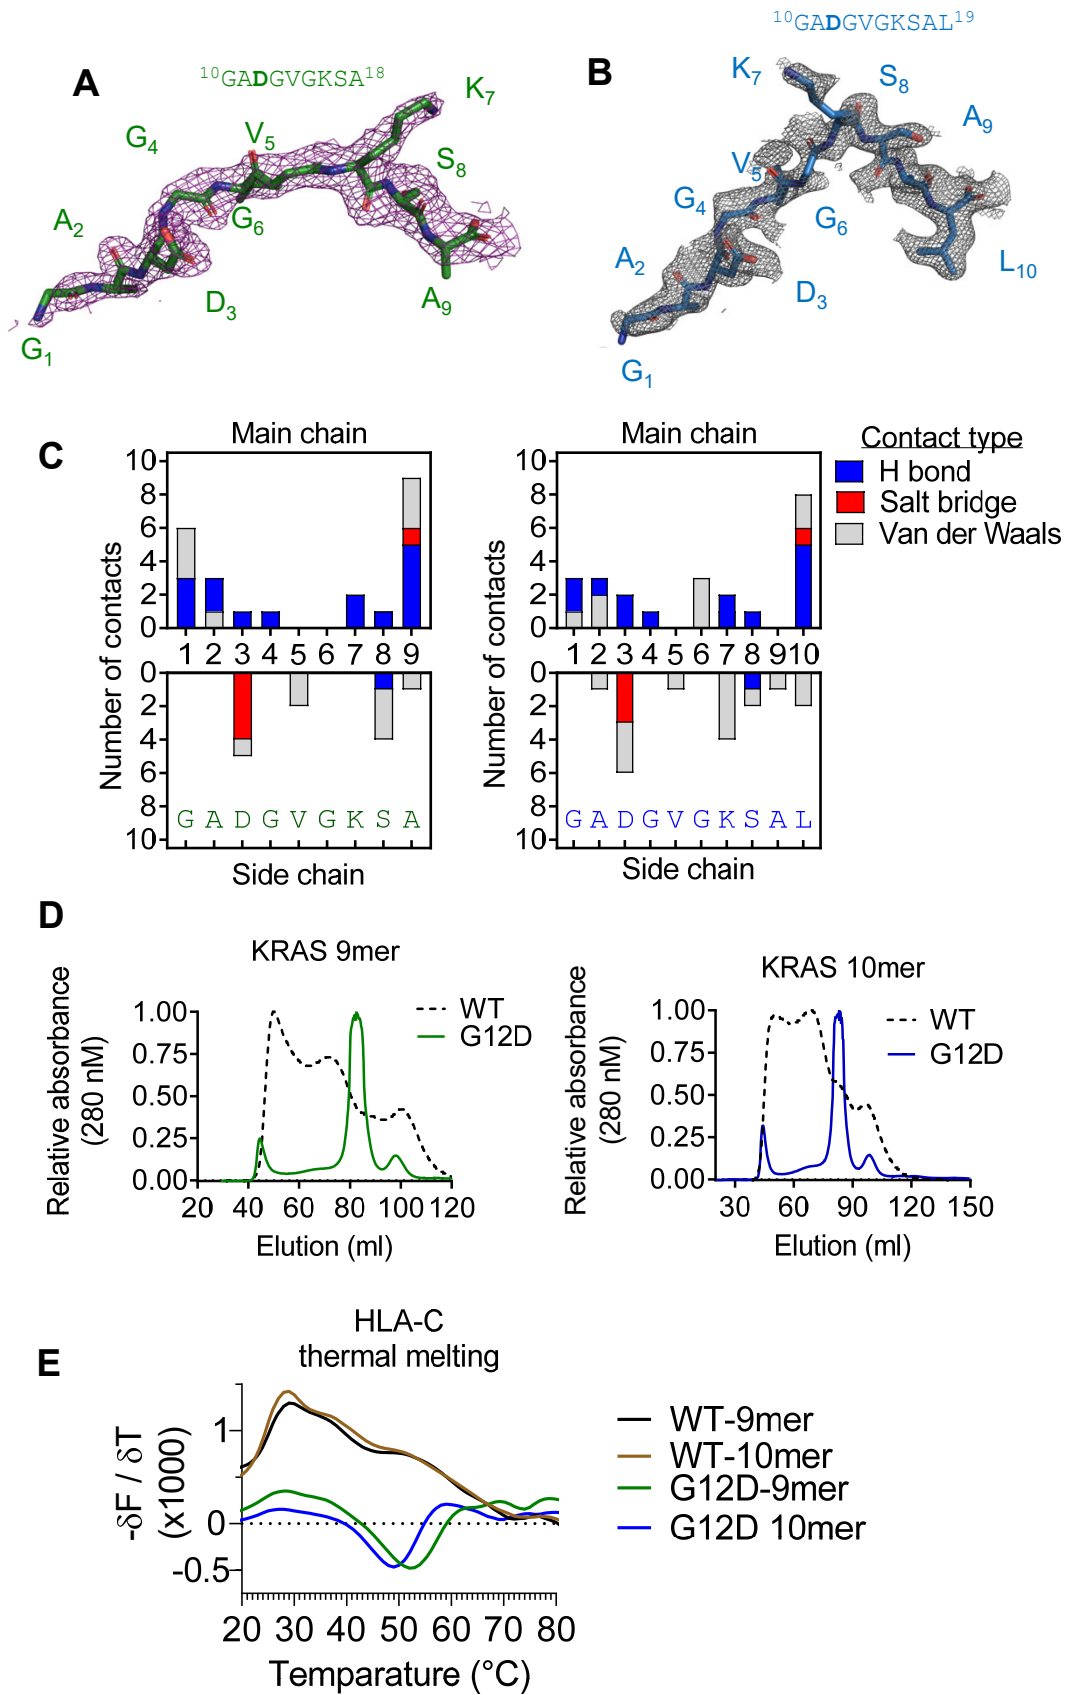

**Figure S1.**

**(A-B)** Stick model of the KRAS-G12D 9mer (A) and 10mer (B) bound to HLA-C\*08:02 with 2Fo-Fc omit maps contoured to  $1.2\sigma$ .

**(C)** Number of contacts between HLA-C\*08:02 and the KRAS-G12D 9mer (*left*) and 10mer (*right*). Contacts with the peptide main chain (*top*) and side chain (*bottom*) residues. Contacts are defined as hydrogen (H) bonds, salt bridges or van der Waals contacts between atoms within 3.5 Å.

**(D)** Frequency of TCR<sup>+</sup> Jurkat T cells expressing CD69 after incubation with 221-C\*08:02-ICP47 cells loaded with WT, G12D, G12V, G12R, and G12S KRAS 9mer and 10mer peptides. Peptides were tested from 1000 nM to 1 nM, shown here at 100 nM, data are a summary of 2 independent experiments. Statistical significance was assessed by one-way ANOVA with Dunnett's multiple comparison test (\*\* $p < 0.001$ , \*\*\*\* $p < 0.0001$ ).

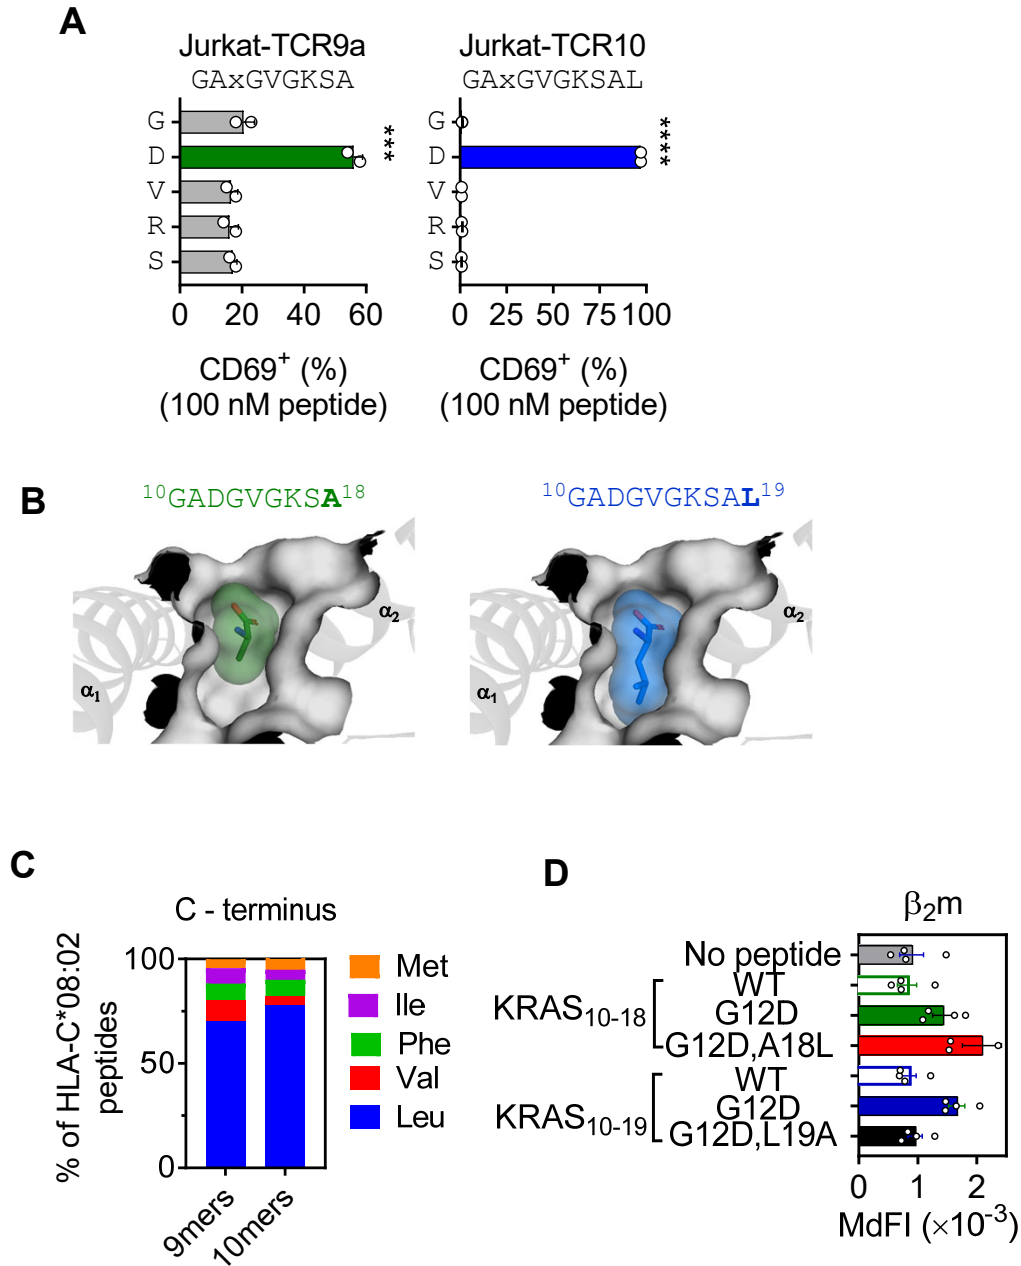

**Figure S2.**

**(A)** Traces of size exclusion chromatography for HLA-C\*08:02 refolded with WT or G12D KRAS 9mer (left) or 10mer (right) peptides. Traces are normalized to the maximum absorbance (280 nm) for each experiment.

**(B)** Space filling model of the C-terminal residue of the G12D 9mer (left) and 10mer (right).

**(C)** Amino acid frequency at the C-terminus of 9mer and 10mer peptides eluted from HLA-C\*08:02. Data from (22).

**(D)** HLA-I stabilization on 221-C\*08:02-ICP47 cells incubated overnight at 26°C with 100  $\mu$ M wild type (WT) and G12D KRAS 9mer, 10mer and C-terminal modified peptides. Data are a summary of 4 independent experiments.

Figure S3.

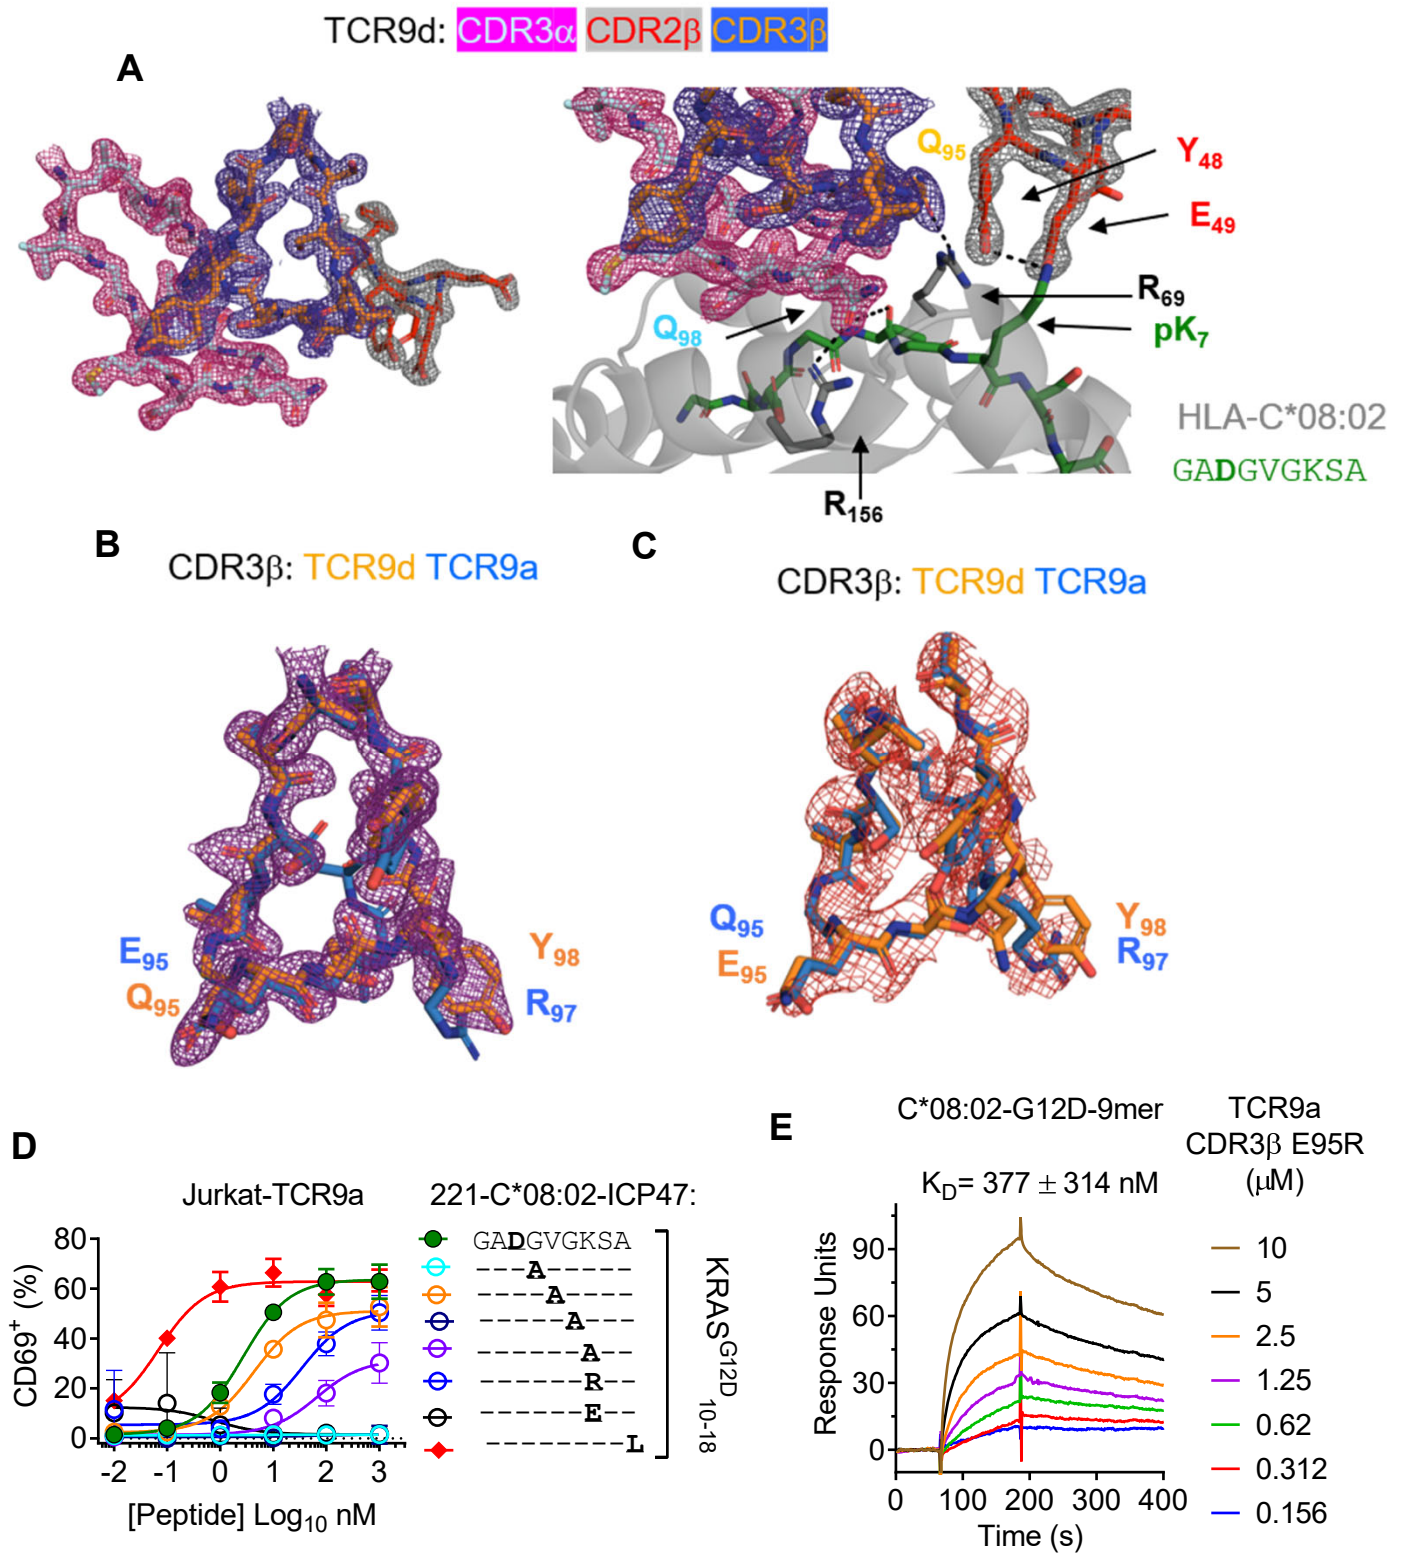

**Figure S3.**

**(A)** 2Fo-Fc omit map of TCR9d contoured to  $2\sigma$ . CDR3 $\alpha$ , CDR3 $\beta$  and CDR2 $\beta$ , are shown alone (left) and in complex with HLA-C (right). CDR3 $\alpha$ , turquoise; CDR3 $\beta$  orange; CDR2 $\beta$ , red; HLA-C, grey; KRAS-G12D-9mer, green.

**(B-C)** Comparing CDR3 $\beta$  structures of TCR9d and TCR9a. 2Fo-Fc omit map of TCR9d contoured to  $2\sigma$  (B) and TCR9a 2Fo-Fc omit map of TCR9d contoured to  $1.2\sigma$  (C). CDR3 $\beta$  contoured to  $1\sigma$ . CDR3 $\beta$  TCR9d, orange; map purple, CDR3 $\beta$  TCR9a, blue; map orange.

**(D)** Frequency of TCR<sup>+</sup> Jurkat T cells expressing CD69 after incubation with 221-C\*08:02-ICP47 cells loaded with WT and G12D KRAS 9mer and mutant 9mer peptides. Amino acids identical to the KRAS sequence are indicated with –. Peptides were tested from 1 nM to 0.1 nM. Data are a mean of 3-4 independent experiments.

**(E)** Binding of TCR9a-CDR3 $\beta$  E95R to immobilized HLA-C\*08:02-KRAS-G12D-9mer at indicated  $\mu$ M concentrations determined by surface plasmon resonance (SPR). Dissociation constants were determined by kinetic curve fitting. Data are representative of two independent experiments.

Figure S4.

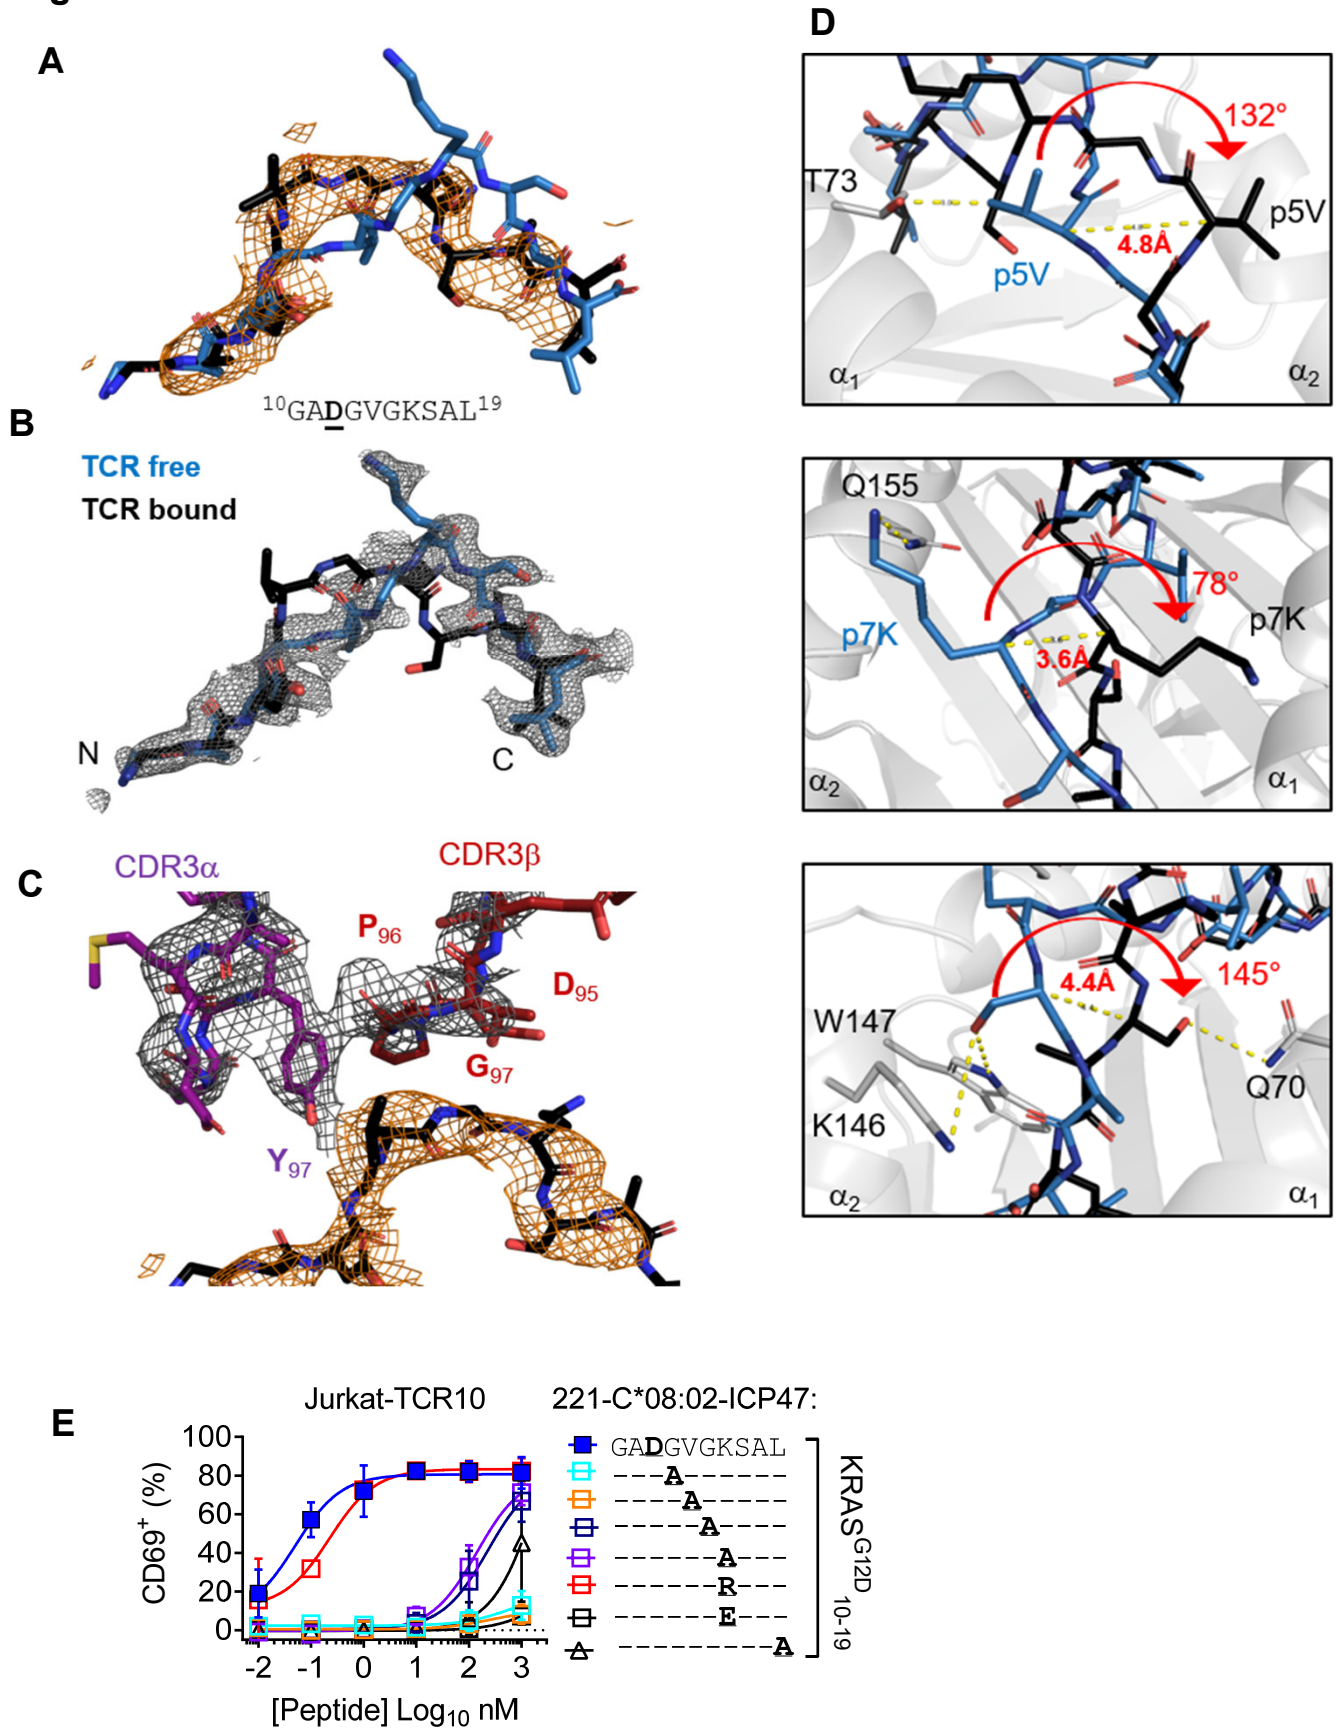

**Figure S4.**

**(A)** 2Fo-Fc omit map 'TCR free' KRAS-G12D 10mer bound to HLA-C\*08:02, contoured to  $1\sigma$ . 'TCR free' model, blue; map, orange; 'TCR10 bound' model, black; HLA-C, grey.

**(B)** 2Fo-Fc omit map map of 'TCR bound' KRAS-G12D 10mer bound to HLA-C\*08:02, contoured to  $1.2\sigma$ . 'TCR bound' model, black; map, red; 'TCR10 free' model, blue; HLA-C, grey.

**(C)** 2Fo-Fc omit map of TCR10 KRAS-G12D 10mer bound to HLA-C\*08:02, contoured to  $1\sigma$ . CDR3 $\alpha$ , purple; CDR3 $\beta$ , red; KRAS-G12D-10mer, black; HLA-C, grey.

**(D)** Changes in the KRAS-G12D 10mer between the TCR free (blue) and TCR bound conformations (black). (*Top*) C $\alpha$  of Val (p5) shifted by 4.8 Å and rotated by 132° breaking a van der Waals (VDW) contact with Thr 73 in the  $\alpha_1$  helix of HLA-C\*08:02. (*Middle*) The Lys at (p7) shifted 3.6 Å and rotated by 78° towards TCR10 breaking h-bonds with Gln 155  $\alpha_2$  helix of HLA-C\*08:02. (*Bottom*) Ser (p8) shifted 4.4 Å and rotated 145° breaking with h-bonds Lys 146 with Trp 147 in the  $\alpha_2$  helix of HLA-C\*08:02 and forming a new h-bond with Gln 70 in the  $\alpha_1$  helix of HLA-C\*08:02.

**(E)** Frequency of TCR<sup>+</sup> Jurkat T cells expressing CD69 after incubation with 221-C\*08:02-ICP47 cells loaded with WT and G12D KRAS 10mer and mutant 10mer peptides. Amino acids identical to the KRAS sequence are indicated with -. Peptides were tested from 1nM to 0.1 nM. Data are a mean of 3-4 independent experiments.



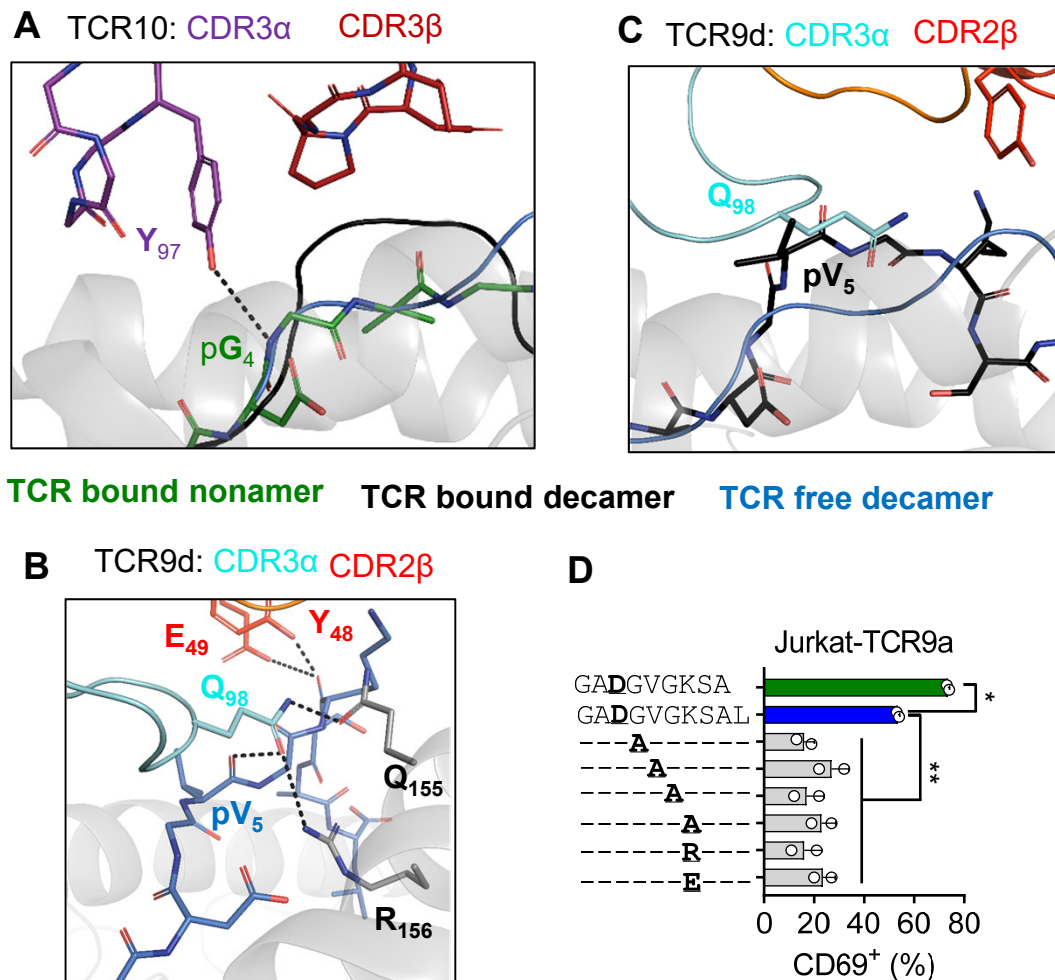

**Figure S5.**

**(A)** Modelling of TCR10 CDR3 $\alpha$  interaction with KRAS-G12D 9mer. CDR3 $\alpha$ , purple; CDR3 $\beta$  red; HLA-C, grey; KRAS-G12D-9mer, green; KRAS-G12D-10mer TCR bound, black; KRAS-G12D-10mer TCR free, blue.

**(B)** Modelling of TCR9d CDR3 $\alpha$  and CDR3 $\beta$  interactions with KRAS-G12D 10mer in TCR bound conformation. CDR3 $\alpha$ , turquoise; CDR3 $\beta$  orange; HLA-C, grey; TCR bound, black; KRAS-G12D-10mer TCR free, blue.

**(C)** Modelling of TCR9d CDR3 $\alpha$  and CDR3 $\beta$  interactions with KRAS-G12D 10mer in TCR free conformation. CDR3 $\alpha$ , turquoise; CDR3 $\beta$  orange; HLA-C, grey; KRAS-G12D-10mer TCR free, blue.

**(D)** Frequency of TCR<sup>+</sup> Jurkat T cells expressing CD69 after incubation with 221-C\*08:02-ICP47 cells loaded with KRAS-G12D 9mer, and 10mer peptides with indicated amino acid substitutions. Amino acids identical to the KRAS sequence are indicated with -. Peptides were tested from 1000 nM to 1 nM, shown here at 100 nM, data are a summary of 2 independent experiments. Statistical significance was assessed by one-way ANOVA with Dunnett's multiple comparison test (\* p < 0.05, \*\* p < 0.01).

|                                 | HLA-C*08:02-<br>GADGVGKSA | HLA-C*08:02-<br>GADGVGKSAL | TCR9d HLA-<br>C*08:02-<br>GADGVGKSA | TCR9a-HLA-<br>C*08:02-<br>GADGVGKSA | TCR10-HLA-C*08:02-<br>GADGVGKSAL |
|---------------------------------|---------------------------|----------------------------|-------------------------------------|-------------------------------------|----------------------------------|
| <b>PDB code</b>                 | 6ULI                      | 6ULK                       | 6ULN                                | 6ULR                                | 6UON                             |
| <b>Data collection</b>          |                           |                            |                                     |                                     |                                  |
| Temperature (K)                 | 100.00                    | 100.00                     | 100.00                              | 100.00                              | 100.00                           |
| Space group                     | C 1 2 1                   | C 1 2 1                    | P1 2 <sub>1</sub> 1                 | P1 2 <sub>1</sub> 1                 | P1 2 <sub>1</sub> 1              |
| <i>Cell dimensions</i>          |                           |                            |                                     |                                     |                                  |
| <i>a, b, c (Å)</i>              | 95.3, 76.1, 62.7          | 95.6, 77.1, 62.3           | 72.8, 74.0, 107.5                   | 73.0, 74.0, 107.9                   | 63.4, 79.3, 196.7                |
| <i>α, β, γ (°)</i>              | 90.0, 118.1, 90.0         | 90.0, 120.6, 90.0          | 90.0, 101.7, 90.0                   | 90.0, 101.5, 90.0                   | 90.0, 91.1, 90.0                 |
| Resolution range (Å)            | 50.0-1.9 (1.90-1.93)      | 50.0-1.9 (1.90-1.93)       | 50.0-2.0 (2.00-2.03)                | 50.0-3.2 (3.20-3.26)                | 50.0-3.5 (3.5-3.56)              |
| R <sub>merge</sub> (%)          | 9.5 (63.2)                | 11.2 (39.5)                | 15.2 (85.9)                         | 17.4 (48.8)                         | 28 (111)                         |
| <i>I/σ(I)</i>                   | 42.1 (4.0)                | 21.8 (8.7)                 | 21.5 (2.0)                          | 25.0 (9.3)                          | 16.7 (1.9)                       |
| Completeness (%)                | 100 (100)                 | 99.5 (100)                 | 100 (99.4)                          | 95.9 (92.3)                         | 100 (100)                        |
| Redundancy                      | 7 (6.1)                   | 5.3 (6.4)                  | 7 (5.1)                             | 5.4 (5.3)                           | 8.9 (7.0)                        |
| Total observations              | 217185                    | 118478                     | 526630                              | 96239                               | 237149                           |
| Unique observations             | 31888 (1534)              | 30790 (1574)               | 75046 (3708)                        | 17905 (874)                         | 26510 (1293)                     |
| <b>Refinement</b>               |                           |                            |                                     |                                     |                                  |
| Refinement resolution (Å)       |                           |                            |                                     |                                     |                                  |
| <i>R<sub>work</sub></i> (%)     | 19.9                      | 22.1                       | 18.5                                | 22.2                                | 25.2                             |
| <i>R<sub>free</sub></i> (%)     | 22.6                      | 27.0                       | 21.8                                | 26.2                                | 29.4                             |
| <i>No. of atoms</i>             |                           |                            |                                     |                                     |                                  |
| Protein                         | 3123                      | 3089                       | 6485                                | 6485                                | 13108                            |
| Water                           | 128                       | 229                        | 545                                 | 30                                  | 0                                |
| Mean B-factor (Å <sup>2</sup> ) | 44.10                     | 31.00                      | 38.40                               | 42.60                               | 126.08                           |
| <i>rmsd from ideal values</i>   |                           |                            |                                     |                                     |                                  |
| Bond lengths (Å)                | 0.006                     | 0.004                      | 0.004                               | 0.002                               | 0.005                            |
| Bond angles (°)                 | 0.82                      | 0.7                        | 0.60                                | 0.51                                | 0.89                             |
| <i>Ramachandran statistics</i>  |                           |                            |                                     |                                     |                                  |
| Favored                         | 97.90                     | 95.23                      | 95.62                               | 93.37                               | 95.02                            |
| Outliers                        | 0.00                      | 0.00                       | 0.00                                | 0.00                                | 0.00                             |

**Table S1. Structural data and refinement statistics.**

Data for outer shell shown in parentheses ( ).

| <b>TCR</b> | <b>T<sub>m</sub> (°C)</b> |
|------------|---------------------------|
| <b>9a</b>  | 47.3 ± 0.4                |
| <b>9b</b>  | 47 ± 0                    |
| <b>9c</b>  | 45.9 ± 2.0                |
| <b>9d</b>  | 46.8 ± 0.4                |
| <b>10</b>  | 61.8 ± 0.4                |

**Table S2. Melting temperatures of recombinant KRAS-G12D specific TCRs.**

|              | <b>Vα4</b> | <b>HLA-C</b>   | <b>Vα10</b> |
|--------------|------------|----------------|-------------|
|              | 3          | E58            |             |
|              | 25         | R62            | 14          |
|              | 8          | K66            | 3           |
|              | 3          | R69            |             |
|              |            | R131           | 6           |
|              |            | E154           | 3           |
|              | 10         | Q155           | 4           |
|              | 3          | R156           |             |
|              |            | R157           | 1           |
|              |            | A158           | 3           |
|              | 3          | T163           | 3           |
|              | 13         | E166           |             |
|              | 11         | W167           |             |
|              | 1          | R169           |             |
|              | 1          | R170           |             |
| <b>Total</b> | <b>81</b>  |                | <b>37</b>   |
|              | <b>Vα4</b> | <b>Peptide</b> | <b>Vα10</b> |
|              | 2          | pG4            | 8           |
|              | 11         | pV5            | 1           |
|              | 5          | pG6            |             |
| <b>Total</b> | <b>18</b>  |                | <b>9</b>    |
|              | <b>Vβ5</b> | <b>HLA-C</b>   | <b>Vβ12</b> |
|              |            | Q65            | 1           |
|              | 12         | R69            | 8           |
|              | 2          | A150           |             |
|              | 1          | R151           |             |
|              | 4          | Q155           | 1           |
| <b>Total</b> | <b>19</b>  |                | <b>10</b>   |
|              | <b>Vβ5</b> | <b>Peptide</b> | <b>Vβ12</b> |
|              |            | pG4            | 2           |
|              |            | pV5            | 9           |
|              |            | pG6            | 1           |
|              | 9          | pK7            | 5           |
| <b>Total</b> | <b>9</b>   |                | <b>17</b>   |

**Table S3. TCR contacts with peptide-HLA-C.** Number of contacts with each TCR chain and either HLA-C or peptide. Data for complexes of TCR9d (6ULN) and TCR10 (6UON) with HLA-C.

|                              | HLA-C | Peptide | %    |
|------------------------------|-------|---------|------|
| <b>V<math>\alpha</math>4</b> | 81    | 18      | 78.0 |
| <b>V<math>\beta</math>5</b>  | 19    | 9       | 22.0 |
| <b>%</b>                     | 78.7  | 21.3    |      |

|                               | HLA-C | Peptide | %    |
|-------------------------------|-------|---------|------|
| <b>V<math>\alpha</math>10</b> | 37    | 9       | 63.0 |
| <b>V<math>\beta</math>12</b>  | 10    | 17      | 37.0 |
| <b>%</b>                      | 64.4  | 35.6    |      |

**Table S4. Number of TCR contacts with peptide or HLA-C.** Data for complexes of TCR9d (6ULN) and TCR10 (6UON) with HLA-C.
